# Supplementary material
Source: PubMed Central journal article supplement (PMC8853860)
Supplement: mmc1.pdf [file mmc1.pdf]

# CONSENSO DE EXPERTOS SOBRE LA EFICACIA Y SEGURIDAD DE LOS iDPP-4 EN EL TRATAMIENTO DE PACIENTES CON DIABETES Y COVID-19

## EXPERT CONSENSUS ON EFFECTIVENESS AND SAFETY OF iDPP-4 IN THE TREATMENT OF PATIENTS WITH DIABETES AND COVID-19

### RESUMEN

**Antecedentes:** El objetivo de este consenso es esclarecer el papel de los iDPP-4 en el manejo de los pacientes con diabetes durante la pandemia por COVID-19.

**Material y métodos:** Se llevó a cabo una búsqueda bibliográfica en PubMed (diciembre 2019-febrero de 2021). Se empleó la metodología Oxford y se establecieron de forma consensuada posibles recomendaciones.

**Resultados:** La diabetes parece ser un factor independiente en la enfermedad de COVID-19 (evidencia 2b). No se demuestra mayor riesgo de contagio con iDPP-4 (evidencia 2b) y su uso ha demostrado ser seguro (evidencia 2b). Los iDPP-4 pueden presentar un cierto beneficio en la reducción de la mortalidad, particularmente su uso intrahospitalario (evidencia 2a), reduciendo la admisión a unidades de cuidados intensivos (evidencia 2b) y la necesidad de ventilación mecánica (evidencia 2b).

**Conclusiones:** Los iDPP-4 parecen ser fármacos seguros en pacientes con COVID-19 y se necesitan estudios de calidad que aclaren sus posibles ventajas.

**Palabras clave:** diabetes, COVID-19, iDPP-4, mortalidad, fármacos antidiabéticos

### ABSTRACT

**Background:** This consensus aims to clarify the role of Dipeptidyl Peptidase-4 inhibitors (iDPP-4) in managing patients with diabetes during the COVID-19 pandemic.

**Materials and methods:** A PubMed bibliographic search was carried out (December 2019-February 2021). Oxford methodology was used for the evaluation of evidence and possible recommendations were established by consensus.

**Results:** Diabetes appears to be an independent factor in COVID-19 disease (evidence 2b). No increased risk of contagion with iDPP-4 is demonstrated (evidence 2b), and its use has been shown to be safe (evidence 2b). The use of this drug may present a specific benefit in reducing mortality, particularly in in-hospital use (evidence 2a), reducing admission to intensive care units (evidence 2b) and the need for mechanical ventilation (evidence 2b).

**Conclusions:** The use of iDPP-4 appears to be safe in patients with COVID-19, and quality studies are needed to clarify their possible advantages further.

**Key words:** diabetes, COVID-19, iDPP-4, mortality, antidiabetic drugs

## INTRODUCCIÓN

La diabetes parece ser tanto un factor de riesgo como una patología que se agrava con la infección por el virus SARS-CoV-2<sup>1,2</sup>. El manejo del paciente con diabetes en la pandemia de COVID-19 es un aspecto que ha cobrado especial relevancia, ya que las personas con diabetes infectadas por SARS-CoV-2 han demostrado presentar un mayor riesgo de peor pronóstico y mortalidad<sup>3</sup>. Se ha estimado que la prevalencia de diabetes en los pacientes fallecidos por COVID-19 se sitúa entre el 20 y el 50%<sup>1</sup>.

Dada la alta prevalencia mundial de la diabetes, estos individuos representan un gran segmento vulnerable de la población con COVID-19. La razón de la peor evolución de los pacientes con diabetes no está todavía del todo clara, pudiendo deberse a la respuesta inmune deteriorada frente al SARS-CoV-2 como resultado de la hiperglucemia crónica<sup>4</sup> y/o a la inflamación crónica de bajo grado asociada a la diabetes<sup>5</sup>. El peor pronóstico de las personas con diabetes se ha relacionado con la propia naturaleza sindrómica de la enfermedad y con las comorbilidades asociadas<sup>6</sup>. De hecho, datos procedentes de diferentes fuentes muestran que la pérdida del control metabólico es el factor de riesgo más importante en el desarrollo de COVID-19 grave<sup>7</sup>.

Por ello, cada día cobra mayor importancia, y se dispone de más datos, sobre el posible papel de los diferentes fármacos hipoglucemiantes en el manejo de estos pacientes, así como su posible impacto en la evolución clínica de la infección por COVID-19 y en el mayor o menor riesgo de contraer la enfermedad<sup>8-10</sup>.

Algunos fármacos antidiabéticos (ADA), como los inhibidores de la dipeptidil-peptidasa-4 (iDPP-4), han suscitado un interés considerable ya que se ha sugerido que pueden desempeñar un papel en reducir el posible contagio del virus y mitigar la gravedad de las complicaciones asociadas con COVID-19<sup>11-13</sup>.

La dipeptidil-peptidasa-4 (DPP-4), originalmente conocida como “antígeno de células T CD26”, es una proteasa soluble multifuncional que se expresa abundantemente en los linfocitos y adipocitos, así como muchos en otros tipos celulares, como las células del endotelio y epitelio pulmonar y en células del sistema inmunitario regulando sus funciones. Así, en los pacientes con diabetes se ha planteado que los iDPP-4 podrían desempeñar un papel importante, no solo en la homeostasis de la glucosa, sino también en el contagio del virus y en las respuestas inflamatorias e inmunitarias modificando la evolución clínica de la enfermedad<sup>14</sup>.

El objetivo de este documento de revisión y consenso es resumir todos los datos disponibles sobre el impacto potencial de los iDPP-4 en los resultados clínicos de pacientes con diabetes durante la COVID-19, tanto en pacientes con diabetes atendidos en medio extrahospitalario como en aquellos que requirieron manejo intrahospitalario, y establecer recomendaciones basadas en la evidencia disponible hasta la fecha.

## **METODOLOGÍA**

Para llevar a cabo este documento de revisión y consenso se convocó a varias sociedades científicas y a una Fundación relacionadas todas ellas con el manejo clínico de la diabetes (Sociedad Española de Medicina Interna, Sociedad Española de Diabetes, Sociedad Española de Endocrinología y Nutrición, y Fundación redGDPS). Todas ellas estuvieron de acuerdo en participar en la iniciativa y nombraron cada una a dos personas miembros de su sociedad científica correspondiente y con experiencia en el manejo de la diabetes. Después de revisar y seleccionar la bibliografía, llevar a cabo el análisis pertinente de la evidencia disponible, y acordar las preguntas clínicas a plantearse, se establecieron de forma consensuada posibles recomendaciones.

### **Búsqueda bibliográfica**

Se llevó a cabo una búsqueda bibliográfica en la base de datos PubMed desde diciembre 2019 hasta febrero de 2021 según la estrategia de búsqueda especificada en la **Tabla 1**.

Se consideraron diferentes tipos de artículos (metaanálisis, revisiones, guías de práctica clínica, ensayos clínicos, estudios observacionales, informes de casos, encuestas o artículos de opinión) sobre el tratamiento de iDPP-4 en pacientes con diabetes y COVID-19. No se establecieron límites en la búsqueda en función de la región geográfica, la edad y el sexo de los pacientes, la gravedad de la enfermedad u otros factores. Se consideró así mismo la experiencia en el uso de iDPP-4 en distintos escenarios (ambulatorio-domiciliario y hospitalario). Los resultados se completaron con una segunda búsqueda manual a la luz de determinados aspectos mencionados en alguno de los artículos revisados que se consideraron relevantes.

Los revisores llevaron a cabo de forma independiente la selección de la literatura, el análisis de datos, la evaluación de los temas más relevantes y el análisis de calidad. La **Figura 1** presenta el diagrama PRISMA de cómo se llevó a cabo el proceso de selección de los artículos. En función de esta revisión se establecieron las preguntas clínicas de interés.

### **Metodología Oxford**

La calidad de los artículos seleccionados se valoró mediante el empleo de *Oxford Centre for Evidence-Based Medicine (CEBM) Levels of Evidence* (Oxford CEBM, 2009) (**Tabla 2**)<sup>15</sup>.

### **PREGUNTAS CLÍNICAS**

#### **1) ¿Puede considerarse la diabetes un factor de riesgo independiente en la evolución del paciente con SARS-Cov-2?**

Los datos publicados hasta la fecha señalan que la diabetes no parece aumentar el riesgo de infección por COVID-19, pero la presencia de diabetes en pacientes con COVID-19 es un factor de riesgo en lo que respecta a mortalidad, gravedad de la enfermedad y necesidad de ingreso en la unidad de cuidados intensivos (UCI)<sup>3</sup> (**evidencia 2a**) (**Tabla 3**)<sup>3,16-21</sup>.

Sin embargo, no está del todo claro si este aumento del riesgo se debe a la diabetes *per se* o a que los pacientes con diabetes suelen presentar mayor prevalencia de otros factores de riesgo implicados en un peor pronóstico por COVID-19 como la obesidad, enfermedad cardiovascular, hipertensión o la hiperglucemia. En un análisis de regresión

múltiple<sup>22</sup>, se observó que, en pacientes con diabetes, pero no en aquellos sin diabetes, la hipertensión y la enfermedad cardiovascular fueron factores de riesgo independientes de muerte en el hospital por COVID-19 (*hazard ratio* [HR]: 3,10 y 1,87, respectivamente). De modo más reciente, en un estudio basado en el registro de los casos hospitalizados entre el 11 de marzo y el 30 de abril de 2020 en el Hospital General de Massachusetts, donde el 39% de los pacientes presentaban diabetes, el análisis de regresión logística multivariable mostró que la diabetes se asociaba con mayores probabilidades de ingreso en la UCI (*odds ratio* [OR]: 1,59 [IC95%: 1,01-2,52]), ventilación mecánica (OR: 1,97 [IC95%:1,21-3,20]) y muerte (OR: 2,02 [IC95%:1,01-4,03]) independientemente de la edad, sexo, raza o etnia, índice de masa corporal (IMC) y otras comorbilidades médicas (como enfermedad cardiovascular, enfermedad renal, hipertensión, etc.)<sup>23</sup> (**evidencia 2b**).

El peor pronóstico en la diabetes se ha asociado también con la hiperglucemia<sup>4,24</sup> y otros mecanismos como el entorno proinflamatorio subyacente en estos pacientes<sup>25,26</sup>, que parece favorecer una respuesta inmune anormal e ineficaz a la infección por COVID-19 (**evidencia 2b**). Un inadecuado control de la glucemia ha demostrado un aumento significativo del riesgo de gravedad por COVID-19, en pacientes con y sin diabetes<sup>27</sup>, aunque en pacientes con diabetes se ha relacionado con una mayor alteración de los parámetros inflamatorios y de regulación inmunitaria<sup>28</sup> (**evidencia 2b**). Se ha comprobado además que los niveles circulantes de algunas citoquinas como la interleucina-6 (IL-6) son mayores en pacientes con COVID-19 y diabetes, presentando peor pronóstico que en pacientes sin diabetes, lo que sugiere que en presencia de un entorno proinflamatorio subyacente la diabetes sería un factor de riesgo independiente de peores resultados (**evidencia 5**)<sup>25</sup>. Las guías más recientes recomiendan un control continuo y fiable de la glucemia, establecen objetivos en la monitorización de la glucosa manteniendo los niveles en rango y un manejo farmacológico adecuado<sup>29</sup>.

**Consenso de expertos:** *Basándose en esto, en la diabetes, independientemente de un adecuado control de comorbilidades como la obesidad o la enfermedad cardiovascular, se recomendaría sensibilizar respecto a la importancia de un control óptimo de la glucemia, precaución en la discontinuación prematura de la terapia establecida y optimización de la terapia antidiabética valorando posibles implicaciones de los fármacos en la inflamación. En el paciente con diabetes y*

*COVID-19, podrían ser factores a considerar la selección de fármacos que garanticen poca fluctuación en el control de la glucemia y hayan demostrado ser seguros en las distintas situaciones (prehospitalización, hospitalización, UCI).*

## **2) ¿Los pacientes en tratamiento con iDPP-4 tienen mayor o menor riesgo de infectarse cuando se exponen al SARS-Cov-2?**

El papel que desempeña la DPP-4 como receptor del MERS-CoV ha estimulado considerables especulaciones sobre si los iDPP-4 podrían interferir en la infectividad del SARS-CoV-2<sup>30</sup>. Utilizando un enfoque de modelización, una publicación reciente demostró que el dominio S1 de la glucoproteína de espiga SARS-CoV-2 podría interactuar con la membrana humana DPP-4 permitiendo la entrada del virus<sup>31</sup>. Sin embargo, los datos experimentales no apoyan de forma concluyente la afirmación de que la DPP-4 recombinante humana se une al SARS-CoV-2<sup>32</sup>.

Respecto al posible papel de los iDPP-4, un estudio de acoplamiento molecular o *docking*, usado para predecir la fuerza de la asociación o la afinidad de enlace entre dos moléculas, demuestra que los iDPP-4 son inhibidores de la principal proteasa de COVID-19 (SARS-CoV-2 M<sup>pro</sup>) sugiriendo un posible efecto antivírico<sup>33</sup> y se ha visto que su uso podría tener un efecto protector en individuos mayores de 80 años<sup>34</sup> (**evidencia 2b**), con más receptores de DPP-4<sup>35</sup>. De forma más directa, en un registro llevado a cabo en Italia se exploró la posible asociación entre los iDPP-4 para la diabetes y el riesgo de infección por COVID-19. En este estudio, se cruzaron los datos de los casos registrados de infección por COVID-19 procedentes del sistema de vigilancia italiano de pacientes diagnosticados de SARS-CoV-2 y la información sobre medicamentos para la diabetes, obtenida de la base de datos de reembolsos sobre prescripción de medicamentos, y se concluyó que los iDPP-4 no parecen tener ningún efecto protector o perjudicial en la incidencia de COVID-19 (**evidencia 2b**)<sup>36</sup>, constatando datos recientes sobre su papel neutro en la incidencia de infecciones respiratorias<sup>37</sup>.

**Consenso de expertos:** *Aunque existe una posible interacción entre el SARS-CoV-2 y la DPP-4, el uso de iDPP-4 no parece incrementar, pero tampoco reducir el riesgo de infección por SARS-CoV-2.*

### **3) ¿Los pacientes en tratamiento con iDPP-4 tienen más riesgo de ser hospitalizados por SARS-CoV-2?**

Se ha visto que los niveles séricos circulantes de DPP4 soluble son muy inferiores en pacientes infectados con COVID-19 en comparación con sujetos sanos (46,5 ng/mL vs. 125,3 ng/mL;  $p < 0,0001$ )<sup>38</sup> y se reducen en aproximadamente un 50% en personas hospitalizadas con COVID-19, lo que sugeriría un posible papel de la DPP-4 en estos pacientes (**evidencia 5**)<sup>39</sup>.

Un estudio de casos y controles analiza la exposición a iDPP-4 en pacientes con diabetes hospitalizados por COVID-19. Para establecer el grupo control, se recuperó la información sobre la exposición a iDPP-4 en sujetos de la misma área que no estaban hospitalizados. Se constató que la tasa de exposición a iDPP-4 entre los pacientes con diabetes mellitus tipo 2 (DM2) infectados con SARS-CoV-2 hospitalizados por COVID-19 era superponible a la de los pacientes emparejados en la misma región o a los de la clínica ambulatoria local. También se observaron tasas similares de exposición a iDPP-4 cuando los pacientes hospitalizados por COVID-19 se compararon con los pacientes hospitalizados por otras razones (**evidencia 3a**)<sup>40</sup>. Estos datos sugieren que los iDPP-4 no aumentan el riesgo de hospitalización en pacientes con COVID-19 y se consideran una opción terapéutica válida para el manejo de pacientes con diabetes y COVID-19 sintomático (**evidencia 4**).

***Consenso de expertos:** con los datos existentes en la actualidad los iDPP-4 no aumentan el riesgo de hospitalización en pacientes con COVID-19. Por ello, se sugiere mantener el tratamiento con iDPP-4 en caso de situaciones epidemiológicas de alto o muy alto riesgo y en caso de enfermedad COVID-19 leve o moderada sin necesidad de hospitalización.*

### **4) ¿A nivel fisiológico o de mecanismo de acción hay evidencias respecto a las posibles ventajas que pueden aportar los iDPP-4 en el desarrollo de la enfermedad tras el contagio?**

Además del posible efecto del bloqueo de los receptores DPP4 sobre la entrada y replicación del virus dentro de las vías respiratorias anteriormente mencionado, los iDPP-4 presentan efectos antiadipogénicos, antiagregantes y antiinflamatorios que se ha

señalado podrían tener un impacto en la reducción de los riesgos y desarrollo de la enfermedad tras el contagio<sup>41-44</sup>.

La sobreproducción de citoquinas proinflamatorias, denominada “tormenta de citoquinas”, se ha implicado en complicaciones graves en pacientes con COVID-19 y los niveles elevados de proteína C reactiva (PCR) e IL-6 han demostrado ser factores de riesgo independientes para evaluar la gravedad<sup>45-47</sup> (**evidencia 2b**). Los estudios han demostrado que la iniciación de los iDPP-4 da lugar a la reducción de la producción de citoquinas, disminuyendo particularmente los niveles de IL-6, IL-8 y TNF- $\alpha$ <sup>48</sup> y un metanálisis reciente señala, así mismo, una reducción significativa en los niveles de la PCR después de la terapia con iDPP-4 en comparación con placebo<sup>49</sup>.

En conjunto, estos hallazgos pueden sugerir un papel potencial para la inhibición o modulación de uno o más pasos de la inmunopatogénesis de COVID-19 avalado por distintos estudios experimentales (**Tabla 4**).

***Consenso de expertos:** Los efectos antiinflamatorios, antiagregantes y antiadipogénicos de los iDPP-4, así como la posible modulación de los receptores DPP4 en la entrada del virus, son mecanismos fisiológicos potenciales que podrían interactuar en un desarrollo más favorable de la enfermedad por COVID-19.*

##### 5) ¿El uso de iDPP-4 podría tener algún impacto sobre la mortalidad?

Los resultados de la valoración de los estudios indican un mayor nivel de evidencia de un efecto beneficioso o neutro de este grupo de ADA (**evidencia 2a**). Cuatro metanálisis, 11 estudios observacionales, un estudio de casos y controles, y una serie de casos señalan un efecto beneficioso o neutro de los iDPP-4 sobre la mortalidad. Un estudio de cohortes señala un pequeño [1,07 (1,01-1,13)]<sup>72</sup>, pero significativo aumento de la mortalidad, que puede explicarse por el gran tamaño muestral y un probable sesgo de selección al prescribirse preferentemente a pacientes mayores y frágiles (**Tabla 5**)<sup>6,10,37,40,55-73</sup>.

El posible efecto de estos fármacos podría ser más evidente en pacientes hospitalizados, tal y como refleja el metanálisis de Pal et al, que identificó 9 estudios observacionales de alta calidad con información de 7.008 pacientes con diabetes afectados de COVID-

19. El análisis agrupado no mostró ninguna asociación significativa entre el uso de iDPP-4 y la mortalidad en pacientes con diabetes y COVID-19. Sin embargo, en el análisis de subgrupos, los autores observaron que el uso intrahospitalario de iDPP-4 se asociaba con una reducción de la mortalidad (OR ajustada: 0,27, IC95%: 0,13 a 0,55,  $p = 0,0003$ ). Los autores concluyen que sería prudente iniciar o continuar con el tratamiento con iDPP-4 en pacientes con diabetes y COVID-19 si no estuviese contraindicado (**evidencia 2a**)<sup>55</sup>. Otro metanálisis de 4 estudios observacionales con un total de 1.933 pacientes con COVID-19 y DM2 demostró que el uso de iDPP-4 se asociaba negativamente con el riesgo de mortalidad (OR = 0,58 IC95%, 0,34-0,99]. Este metanálisis incluyó estudios centrados en el uso de iDPP-4 tanto antes de la admisión en el hospital como durante el ingreso hospitalario (**evidencia 2a**)<sup>56</sup>. En la misma línea, una serie de 387 casos con COVID-19 (80 con diabetes) mostró una disminución de la mortalidad [aHR= 0,13 (0,02-0,92)] en aquellos pacientes tratados de forma ambulatoria e intrahospitalaria con iDPP-4 (**evidencia 4**)<sup>57</sup>.

Previo a la admisión hospitalaria, se ha corroborado también que los iDPP-4 disminuyen la mortalidad o no afectan a esta, tal y como demuestran 2 metanálisis y varios estudios observacionales publicados. El primer metanálisis analizó la mortalidad a los 7 y 28 días en (**evidencia 2a**)<sup>63</sup>, y el segundo realizó una valoración conjunta de la mortalidad y curso grave de la enfermedad demostrando que no había un aumento en el riesgo entre los pacientes que tomaban iDPP-4 previo a la hospitalización en comparación con aquellos que no los empleaban (OR = 1,15; IC95% 0,64-2,06) (**evidencia 2a**).<sup>64</sup>

Dado el posible impacto positivo del uso de los iDPP-4, particularmente en pacientes hospitalizados, se han puesto en marcha varios estudios aleatorizados para aclarar este aspecto (NCT04365517, NCT04341935, NCT04371978).

***Comentario de expertos:** El uso extrahospitalario de iDPP-4 ha demostrado no aumentar el riesgo de mortalidad en pacientes con diabetes y COVID-19. El uso intrahospitalario de iDPP-4 podría estar asociado con una reducción significativa de la mortalidad en pacientes con diabetes y COVID-19. Por lo tanto, sería prudente iniciar o continuar con los iDPP-4 en pacientes con COVID-19 si no estuviese contraindicado.*

6) ¿El uso de iDPP-4 podría aumentar el riesgo de desarrollar enfermedad grave?

El metanálisis de Kow et al<sup>64</sup>, que incluyó un total de 6 estudios observacionales, analiza el impacto del uso previo a la hospitalización de los iDPP-4 sobre la gravedad de la enfermedad y demuestra que no hay un aumento del riesgo de mayor gravedad (**evidencia 2a**). La definición de enfermedad grave en pacientes con COVID-19 no fue la misma en los 6 estudios incluidos. En los estudios de Chen et al<sup>67</sup> y de Yan et al<sup>71</sup>, la enfermedad grave se definió en función del diagnóstico y plan de tratamiento para COVID-19, emitido por la Comisión Nacional de Sanidad de China. En el estudio de Kim et al<sup>68</sup>, la enfermedad grave se definió sobre la base del uso de cánula nasal de alto flujo, ventilación mecánica, terapia de reemplazo renal continuo, oxigenación por membrana extracorpórea y admisión en UCI. En el estudio de Rhee et al<sup>59</sup>, la gravedad de la enfermedad se definió en función de la necesidad de intubación endotraqueal o ventilación mecánica o necesidad de ingreso en la unidad de cuidados intensivos y en el estudio de Dalan et al<sup>73</sup>, el ingreso en UCI fue el criterio de gravedad. Finalmente, en el estudio de Pérez-Belmonte et al<sup>65</sup>, llevado a cabo en España, se definió la gravedad de la enfermedad considerando el ingreso en UCI, el uso de ventilación mecánica invasiva y no invasiva, o la muerte hospitalaria.

Otra evidencia de que los iDPP-4 no aumentan la gravedad de los pacientes se mostró en el estudio *Coronavirus Disease and Diabetes Outcome* (CORONADO), el mayor estudio observacional llevado a cabo para valorar estos fármacos. El estudio CORONADO es un estudio multicéntrico realizado en Francia a nivel nacional que incluyó a 1.317 pacientes hospitalizados por SARS-CoV-2 con antecedentes de DM o DM recién diagnosticada. En este estudio el 21,6% de los participantes estaban en tratamiento con iDPP-4<sup>6</sup> y no se observó ninguna asociación entre un curso grave de COVID-19 y el tratamiento con iDPP-4 antes del ingreso (OR: 1,01, IC95%: 0,75-1,34). Haciendo una valoración global de todos los estudios se observa un efecto beneficioso o neutro sobre la gravedad de la enfermedad con estos fármacos (**Tabla 5**).

El uso de estos fármacos en el momento de la hospitalización, sin embargo, podría reducir significativamente la necesidad de ventilación mecánica [HR: 0,27 (0,11–0,62)], la admisión a UCI [HR: 0,51 (0,27–0,95)] y aumentar el número de pacientes que reciben el alta a los 30 días (120 vs. 89 altas de pacientes;  $p = 0,0008$ ) según un estudio retrospectivo multicéntrico llevado a cabo en 338 pacientes con DM2 y COVID-19 (**evidencia 2b**)<sup>58</sup>. Este estudio retrospectivo tiene varias limitaciones, ya que se detectó

un ligero aumento en algunos de los marcadores inflamatorios al inicio del estudio en el grupo de atención estándar en comparación con los pacientes tratados con iDPP-4, además de que falta información de algunos datos clínicos que no estaban disponibles para todos los pacientes. Frente a esto, los datos clínicos estuvieron en consonancia con los datos de laboratorio que apuntan a un posible papel inmunomodulador del tratamiento con iDPP-4, ya que se observó una disminución de la PCR y la procalcitonina y un aumento de los niveles de linfocitos durante el seguimiento en los pacientes tratados con iDPP-4 que no se observó con el tratamiento estándar. Así mismo, se describió un mejor control glucémico y poca fluctuación en la glucemia en ayunas en el grupo tratado con iDPP-4 en comparación con el tratamiento estándar.

***Consenso de experto:** el tratamiento con iDPP-4 en pacientes hospitalizados estables parece ser una opción de tratamiento segura que no incide sobre la evolución en la gravedad de la enfermedad.*

#### **7) ¿El uso de los iDPP-4 es seguro en el paciente infectado por SARS-Cov-2 en comparación con otros fármacos antidiabéticos?**

En población con diabetes en general, los iDPP-4 han demostrado tener un perfil de seguridad y tolerabilidad óptimo en comparación con otros ADA<sup>74</sup>. Los iDPP-4 presentan la ventaja frente a otros ADA de no inducir hipoglucemias, no modificar el peso corporal y, en los estudios realizados con iDPP-4, el perfil de tolerancia se ha mostrado muy bueno, con bajo riesgo de efectos adversos (muy similar al de placebo) y, a diferencia de otros ADA no aumentan el riesgo de sufrir alteraciones gastrointestinales, como diarrea, náuseas, vómitos o dolor abdominal, ni reacciones cutáneas o síntomas gripales (**evidencia 1a**)<sup>75</sup>. Particularmente relevante en pacientes con COVID-19, como grupo no parecen aumentar el riesgo de infección o neumonía (**evidencia 1a**)<sup>28,76</sup>, aunque se ha señalado algún caso de neumonía intersticial con vildagliptina y de tromboembolismo venoso con sitagliptina<sup>77</sup>.

Algunas revisiones y guías recientes<sup>1,78</sup> señalan que los iDPP-4 son muy seguros y que incluso pueden ser potencialmente beneficiosos para la mayoría de los pacientes hospitalizados con diabetes y COVID-19, ya que en esta situación de ingreso hospitalario el tratamiento con iDPP-4, solo o en combinación con insulina basal, es efectivo y resulta en una menor incidencia de hipoglucemia y en el uso de dosis más bajas de insulina en

comparación con un régimen de insulina en bolo basal<sup>62</sup>. Un total de 3 metanálisis y 16 estudios corroboran su efecto neutro o incluso beneficioso para estos pacientes. En concreto, en el estudio de Zhou et al, después de emparejar de forma rigurosa y ajustar por las posibles variables de confusión, se observa que en el uso intrahospitalario de los iDPP-4, el riesgo e incidencia de efectos secundarios, incluido el shock séptico, el síndrome de dificultad respiratoria aguda o las lesiones agudas de órganos (riñón, hígado y cardíacas) es equiparable entre el grupo tratado con iDPP-4 y el no tratado con iDPP-4. El control de la glucosa, así como la regulación de los parámetros de inflamación, también fue equivalente entre los dos grupos (**evidencia 2b**)<sup>62</sup>.

Los iDPP-4 han demostrado, por tanto, ser fármacos seguros y además no necesitan ajustes en los días de enfermedad en el paciente con diabetes y COVID-19 en comparación con otros fármacos ADA (**Tabla 6**)<sup>1</sup>. En un subanálisis del estudio CORONADO<sup>79</sup>, el mayor estudio de cohortes realizado con iDPP-4 en pacientes con COVID-19, se constata la seguridad de estos fármacos incluso después de un ajuste adicional para la función renal, duración de la diabetes y HbA<sub>1c</sub> (**evidencia 2b**). Aunque solo un ensayo aleatorizado puede responder definitivamente a esta pregunta, basándonos en estudios moleculares, fisiopatológicos y retrospectivos, el uso de los iDPP-4 es seguro y ciertamente beneficioso en el control metabólico.

***Consenso de expertos:** Estos datos respaldan la seguridad de los iDPP-4 para el control de la diabetes durante la pandemia de COVID-19. Los iDPP-4 son un grupo de fármacos asociados a muchas ventajas, incluso en casos graves de COVID-19, porque son bien tolerados, tienen un bajo riesgo de hipoglucemia y pueden usarse, con ajuste de dosis si es pertinente, en situaciones de función renal deteriorada. En este sentido, se podría considerar el uso de los iDPP-4 incluso en pacientes hospitalizados con diabetes y COVID-19.*

#### **8) Teniendo en cuenta los efectos antiinflamatorios de los iDPP-4, ¿hay algún subgrupo de pacientes en el que los iDPP-4 podrían influir en las complicaciones asociadas al COVID-19?**

Los iDPP-4 se consideran una alternativa de tratamiento en individuos con diabetes y enfermedad cardiovascular adicional o enfermedad renal crónica previa<sup>81</sup>. En pacientes con COVID-19, se ha sugerido la hipótesis de que debido a su efecto antiinflamatorio

podría ayudar a prevenir las complicaciones asociadas al COVID-19<sup>82</sup>, y disminuir posibles eventos cardiovasculares relacionados (**evidencia 5**)<sup>83</sup> y tener un papel beneficioso potencial en la inmunopatogénesis de la enfermedad diabética renal y el SARS-CoV-2<sup>84</sup>. Actualmente se están desarrollando estudios como el estudio SIDIACO Sitagliptin (NCT04365517) que permitirá esclarecer las posibles ventajas de estos fármacos en pacientes con estas patologías de base.

***Consenso de expertos:** los pacientes con diabetes y COVID-19 podrían beneficiarse hipotéticamente del empleo de iDPP-4 en presencia de enfermedad cardiovascular adicional o enfermedad renal crónica.*

### **9) ¿Hay diferencias entre los iDPP-4 y otros grupos farmacológicos para el tratamiento de la diabetes en pacientes hospitalizados con COVID-19?**

Como ya se ha comentado previamente, los iDPP-4 han demostrado ser fármacos seguros y no necesitan ajustes en los días de enfermedad en el paciente con diabetes y COVID-19 en comparación con otros ADA orales<sup>77</sup>; su uso en comparación con otros ADA orales se ha relacionado con un menor tiempo de estancia en UCI (**evidencia 2b**)<sup>10</sup> y posibles beneficios en el paciente intrahospitalario, no documentada para otros grupos como las sulfonilureas, o los agonistas de GLP-1R<sup>9</sup>.

Un artículo publicado recientemente en *Lancet Diabetes Endocrinology* analiza el uso de los distintos ADA en pacientes hospitalizados (**Tabla 6**), establece recomendaciones para cada uno de ellos y considera que teniendo en cuenta la seguridad y el perfil de los iDPP-4 se podría considerar el uso en pacientes hospitalizados con diabetes y COVID-19 grave<sup>1</sup>.

Otra revisión reciente que analiza las interrelaciones moleculares entre diabetes, obesidad y resistencia a la insulina en pacientes con COVID-19 y analiza el beneficio potencial de los distintos ADA concluye que, basándonos en los estudios fisiopatológicos y observacionales disponibles hasta el día de hoy, el uso de iDPP-4 es seguro, ciertamente beneficioso en el control metabólico, probablemente puede reducir la gravedad de los pacientes con COVID-19 y recomienda su uso incluso en pacientes hospitalizados en UCI (**Tabla 7**)<sup>78</sup>.

*Consenso de expertos: Sobre la base de los estudios publicados hasta la fecha, podría considerarse que los iDPP-4 presentan un perfil adecuado para el tratamiento de la diabetes en pacientes hospitalizados.*

## **CONCLUSIÓN**

Los iDPP-4 son un grupo de fármacos asociados a muchas ventajas en el contexto de la pandemia de COVID-19, incluso en casos graves, porque son bien tolerados, tienen un bajo riesgo de hipoglucemia, no necesitan de ajuste de dosis en días de enfermedad y pueden usarse en pacientes con la función renal deteriorada.

Después de valorar toda la bibliografía aportada no hay evidencia de calidad suficiente como para recomendar de forma concluyente el tratamiento con iDPP-4 en pacientes con diabetes y COVID-19. Sin embargo, tampoco las hay para desaconsejar su uso.

Una valoración juiciosa sería basarse en la percepción del posible riesgo-beneficio. Hasta la fecha los iDPP-4 han demostrado ser fármacos bien tolerados y relativamente libres de efectos adversos. Su posible riesgo-beneficio favorable en pacientes con diabetes y COVID-19 tiene que ser valorado por los clínicos en cada paciente de forma individual.

Por otro lado, la bibliografía revisada plantea hipótesis que apuntan a beneficios potencialmente sustanciales del tratamiento con iDPP-4 que esperamos sean resueltos con la mayor brevedad en los ensayos clínicos aleatorizados, prospectivos y de alta calidad puestos en marcha.

## **PUNTOS CLAVE:**

- No se demuestra mayor riesgo de contagio con iDPP-4.
- El tratamiento con iDPP-4 en pacientes con diabetes y COVID-19 ha demostrado ser seguro.
- Estudios observacionales señalan que los iDPP-4 pueden presentar un cierto beneficio en la reducción de la mortalidad y el curso de la enfermedad en pacientes con COVID-19, particularmente en pacientes hospitalizados.

## **REFERENCIAS**

1. Bornstein SR, Rubino F, Khunti K, Mingrone G, Hopkins D, Birkenfeld AL, et al. Practical recommendations for the management of diabetes in patients with COVID-19. *Lancet Diabetes Endocrinol*;2020:546–50. [https://doi.org/10.1016/S2213-8587\(20\)30152-2](https://doi.org/10.1016/S2213-8587(20)30152-2).
2. Pal R, Bhadada SK. COVID-19 and diabetes mellitus: An unholy interaction of two pandemics. *Diabetes Metab. Syndr.* 2020; 14:513–7. <https://doi.org/10.1016/j.dsx.2020.04.049>.
3. Apicella M, Campopiano MC, Mantuano M, Mazoni L, Coppelli A, Del Prato S. COVID-19 in people with diabetes: understanding the reasons for worse outcomes. *Lancet Diabetes Endocrinol.* 2020;8(9):782-92. [https://doi.org/10.1016/S2213-8587\(20\)30238-2](https://doi.org/10.1016/S2213-8587(20)30238-2).
4. Williamson EJ, Walker AJ, Bhaskaran K, Bacon S, Bates C, Morton CE, et al. Factors associated with COVID-19-related death using OpenSAFELY. *Nature.* 2020;584(7821):430-6. <https://doi.org/10.1038/s41586-020-2521-4>.
5. Berbudi A, Rahmadika N, Tjahjadi AI, Ruslami R. Type 2 Diabetes and its Impact on the Immune System. *Curr Diabetes Rev.* 2020;16(5):442-449. <https://doi.org/10.2174/1573399815666191024085838>
6. Cariou B, Hadjadj S, Wargny M, Pichelin W, Al-Salameh A, Allix I, et al. Phenotypic characteristics and prognosis of inpatients with COVID-19 and diabetes: the CORONADO study. *Diabetologia* 2020; 63:1500–1515. <https://doi.org/10.1007/s00125-020-05180-x>
7. Moazzami B, Chaichian S, Kasaeian A, Djalalinia S, Akhlaghdoust M, Eslami M, et al. Metabolic risk factors and risk of Covid-19: A systematic review and meta-analysis. *PLoS One.* 2020;15(12):e0243600. <https://doi.org/10.1371/journal.pone.0243600>
8. Berlie HD, Kale-Pradhan PB, Orzechowski T, Jaber LA. Mechanisms and Potential Roles of Glucose-Lowering Agents in COVID-19: A Review. *The Annals of Pharmacotherapy.* 2021. <https://doi.org/10.1177/1060028021999473>
9. Sin10gh AK, Singh R, Saboo B, Misra A. Non-insulin anti-diabetic agents in patients with type 2 diabetes and COVID-19: A Critical Appraisal of Literature. *Diabetes Metab Syndr.* 2021;15(1):159-167. <https://doi.org/>

10. Nafakhi H, Alareedh M, Al-Buthabhak K, Shaghee F, Nafakhi A, Kasim S. Predictors of adverse in-hospital outcome and recovery in patients with diabetes mellitus and COVID-19 pneumonia in Iraq. *Diabetes Metab Syndr*. 2021;15(1):33-38. <https://doi.org/10.1016/j.dsx.2020.12.014>
11. Sun B, Huang S, Zhou J. Perspectives of Antidiabetic Drugs in Diabetes With Coronavirus Infections. *Frontiers in Pharmacology*. 2020;11:592439. <https://doi.org/10.3389/fphar.2020.592439>.
12. Bassendine MF, Bridge SH, McCaughan GW, Gorrell MD. COVID-19 and comorbidities: A role for dipeptidyl peptidase 4 (DPP4) in disease severity? *J Diabetes*. 2020;12(9):649-58. <https://doi.org/10.1111/1753-0407.13052>.
13. Krejner-Bienias A, Grzela K, Grzela T. DPP4 Inhibitors and COVID-19-Holy Grail or Another Dead End? *Arch Immunol Ther Exp (Warsz)*. 2021 Feb 2;69(1):1. <https://doi.org/10.1007/s00005-020-00602-5>.
14. Shao S, Xu Q, Yu X, Pan R, Chen Y. Dipeptidyl peptidase 4 inhibitors and their potential immune modulatory functions. *Pharmacol Ther* 2020;209:107503. <https://doi.org/10.1016/j.pharmthera.2020.107503>
15. Oxford Centre for Evidence-based Medicine (CEBM)-Levels of Evidence (March 2009). Disponible en: <http://www.cebm.net/oxford-centre-evidence-based-medicine-levels-evidence-march-2009/>
16. Kumar A, Arora A, Sharma P. Is diabetes mellitus associated with mortality and severity of COVID-19? A meta-analysis. *Diabetes Metab Syndr Clin Res Rev*. 2020;14:535–545.
17. Fadini GP, Morieri ML, Longato E, Avogaro A. Prevalence and impact of diabetes among people infected with SARS-CoV-2. *J Endocrinol Invest*. 2020;43(6):867-869. doi:10.1007/s40618-020-01236-2.
18. Roncon L, Zuin M, Rigatelli G, Zuliani G. Diabetic patients with COVID-19 infection are at higher risk of ICU admission and poor short-term outcome. *J Clin Virol*. 2020;127.
19. Huang H, Lim MA, Pranata R. Diabetes mellitus is associated with increased mortality and severity of disease in COVID-19 pneumonia – A systematic review, meta-analysis, and meta-regression. *Diabetes Metab Syndr Clin Res Rev*. 2020;14:395–403.

20. Yan Y, Yang Y, Wang F. Clinical characteristics and outcomes of patients with severe covid-19 with diabetes. *BMJ Open Diabetes Res Care*. 2020 <https://doi.org/10.1136/bmjdr-2020-001343> published online April 8.
21. Li B, Yang J, Zhao F. Prevalence and impact of cardiovascular metabolic diseases on COVID-19 in China. *Clin Res Cardiol*. 2020;109:531–538.
22. Shi Q, Zhang X, Jiang F, Zhang X, Hu N, Bimu C, et al. Clinical Characteristics and Risk Factors for Mortality of COVID-19 Patients With Diabetes in Wuhan, China: A Two-Center, Retrospective Study. *Diabetes Care*. 2020;43(7):1382-1391. <https://doi.org/10.2337/dc20-0598>. <https://doi.org/>
23. Seiglie J, Platt J, Cromer SJ, Bunda B, Foulkes AS, Bassett IV, et al. Diabetes as a Risk Factor for Poor Early Outcomes in Patients Hospitalized With COVID-19. *Diabetes Care*. 2020;43(12):2938-44. <https://doi.org/10.2337/dc20-1506>
24. Holman N, Knighton P, Kar P, O'Keefe J, Curley M, Weaver A, et al. Risk factors for COVID-19-related mortality in people with type 1 and type 2 diabetes in England: a population-based cohort study. *Lancet Diabetes Endocrinol*. 2020;8(10):823-33. [https://doi.org/10.1016/S2213-8587\(20\)30271-0](https://doi.org/10.1016/S2213-8587(20)30271-0).
25. Mehta, P, McAuley, DF, Brown, M, Sanchez E, Tattersall RS, Manson JJ, et al. COVID-19: consider cytokine storm syndromes and immunosuppression. *Lancet*. 2020;395(10229):1033-4. [https://doi.org/10.1016/S0140-6736\(20\)30628-0](https://doi.org/10.1016/S0140-6736(20)30628-0).
26. Guo W, Li M, Dong Y, Zhou H, Zhang Z, Tian C, et al. Diabetes is a risk factor for the progression and prognosis of COVID-19. *Diabetes Metab. Res. Rev*. 2020; e3319. <https://doi.org/10.1002/dmrr.3319>.
27. Barrak A, Abdullah A, Al-Shammari A, Bennakhi A, Al-Mulla F, Ali H. Fasting Blood Glucose and COVID-19 Severity: Nonlinearity Matters. *Diabetes Care* Dec 2020; 43(12):3113-6. <https://doi.org/10.2337/dc20-1941>.
28. Zhu L, She ZG, Cheng X, Qin JJ, Zhang XJ, Cai J, et al. (2020). Association of blood glucose control and outcomes in patients with COVID-19 and pre-existing type 2 diabetes. *Cell Metab*. 2020;31:1068–77.e3. <https://doi.org/10.1016/j.cmet.2020.04.021>.

29. Bouhanick B, Cracowski JL, Faillie JL; French Society of Pharmacology, Therapeutics (SFPT). Diabetes and COVID-19. *Therapie*. 2020;75(4):327-333.[https://doi.org/ 10.1016/j.therap.2020.05.006](https://doi.org/10.1016/j.therap.2020.05.006).
30. Drucker DJ. Coronavirus Infections and Type 2 Diabetes-Shared Pathways with Therapeutic Implications. *Endocr Rev*. 2020;41(3):bnaa011.[https://doi.org/ 10.1210/edrev/bnaa011](https://doi.org/10.1210/edrev/bnaa011).
31. Vankadari N, Wilce JA. Emerging WuHan (COVID-19) coronavirus: glycan shield and structure prediction of spike glycoprotein and its interaction with human CD26. *Emerg Microbes Infect*. 2020; 9(1):601-4.[https://doi.org/ 10.1080/22221751.2020.1739565](https://doi.org/10.1080/22221751.2020.1739565).
32. Xi CR, Di Fazio A, Nadvi NA, Patel K, Xiang MSW, et al. A Novel Purification Procedure for Active Recombinant Human DPP4 and the Inability of DPP4 to Bind SARS-CoV-2. *Molecules*. 2020;25(22):5392. <https://doi.org/10.3390/molecules25225392>.
33. Rao PPN, Pham AT, Shakeri A, El Shatshat A, Zhao Y, Karuturi RC, Hefny AA. Drug Repurposing: Dipeptidyl Peptidase IV (DPP4) Inhibitors as Potential Agents to Treat SARS-CoV-2 (2019-nCoV) Infection. *Pharmaceuticals (Basel)*. 2021;14(1):44.<https://doi.org/10.3390/ph14010044>.
34. Ramos-Rincón JM, Pérez-Belmonte LM, Carrasco-Sánchez FJ, Jansen-Chaparro S, De-Sousa-Baena M, Bueno-Fonseca J, et al. Cardiometabolic Therapy and Mortality in Very Old Patients With Diabetes Hospitalized due to COVID-19. *J Gerontol A Biol Sci Med Sci*. 2021 Jul 13;76(8):e102-e109. <https://doi.org/10.1093/gerona/glab124>. PMID: 33945610; PMCID: PMC8135901.
35. Dudkowski C, Tsai M, Liu J, Zhao Z, Schmidt E, Xie J. The pharmacokinetics and pharmacodynamics of alogliptin in children, adolescents, and adults with type 2 diabetes mellitus. *Eur J Clin Pharmacol*. 2017; **73**: 279- 88. [https://doi.org/ 10.1007/s00228-016-2175-1](https://doi.org/10.1007/s00228-016-2175-1).
36. Silverii GA, Monami M, Cernigliaro A, Vigneri E, Guarnotta V, Scondotto S, et al. Are diabetes and its medications risk factors for the development of COVID-19? Data from a population-based study in Sicily. *Nutr Metab Cardiovasc Dis*. 2021;31(2):396-8.[https://doi.org/ 10.1016/j.numecd.2020.09.028](https://doi.org/10.1016/j.numecd.2020.09.028).

37. Grenet G, Mekhaldi S, Mainbourg S, Auffret M, Cornu C, Cracowski JL, et al. DPP-4 Inhibitors and Respiratory Infection: A Systematic Review and Meta-analysis of the Cardiovascular Outcomes Trials. *Diabetes Care*. 2021;44(3):e36-e37. <https://doi.org/10.2337/dc20-2018>.
38. Posadas-Sánchez R, Sánchez-Muñoz F, Guzmán-Martín CA, Hernández-Díaz Couder A, Rojas-Velasco G, Fragoso JM, et al. Dipeptidylpeptidase-4 levels and DPP4 gene polymorphisms in patients with COVID-19. Association with disease and with severity. *Life Sci*. 2021;276:119410. <https://doi.org/10.1016/j.lfs.2021.119410>.
39. Schlicht K, Rohmann N, Geisler C, Hollstein T, Knappe C, Hartmann K, et al. Circulating levels of soluble Dipeptidylpeptidase-4 are reduced in human subjects hospitalized for severe COVID-19 infections. *Int J Obes (Lond)*. 2020;44(11):2335-8. <https://doi.org/10.1038/s41366-020-00689-y>.
40. Fadini GP, Morieri ML, Longato E, Bonora BM, Pinelli S, Selmin E, et al. Exposure to dipeptidyl-peptidase-4 inhibitors and COVID-19 among people with type 2 diabetes: A case-control study. *Diabetes Obes Metab*. 2020;22(10):1946-50. <https://doi.org/10.1111/dom.14097>
41. Iacobellis G. COVID-19 and diabetes: Can DPP4 inhibition play a role?. *Diabetes Res Clin Pract*. 2020;162:108125. <https://doi.org/10.1016/j.diabres.2020.108125>
42. Iacobellis G. Local and systemic effects of the multifaceted epicardial adipose tissue depot. *Nat Rev Endocrinol*. 2015;11:363–71. <https://doi.org/10.1038/nrendo.2015.58>.
43. Trzaskalski NA, Fadzeyeva E, Mulvihill EE. Dipeptidyl peptidase-4 at the interface between inflammation and metabolism. *Clin Med Insights Endocrinol Diabetes*. 2020;13:1179551420912972. <https://doi.org/10.1177/1179551420912972>.
44. Gupta, AK, Verma, AK, Kailashiya, J, Singh, SK, Kumar, N. Sitagliptin: anti-platelet effect in diabetes and healthy volunteers. *Platelets*. 2012;23:565-70. <https://doi.org/10.3109/09537104.2012.721907>.

45. Tay MZ, Poh CM, Rénia L, MacAry PA, Ng LFP. The trinity of COVID-19: immunity, inflammation and intervention. *Nat Rev Immunol.* 2020;20:363-74. <https://doi.org/10.1038/s41577-020-0311-8>.
46. Zhu, Z, Cai, T, Fan, L, Lou K, Hua X, Huang Z, et al. Clinical value of immune-inflammatory parameters to assess the severity of coronavirus disease 2019. *Int J Infect Dis.* 2020;95:332-9. <https://doi.org/10.1016/j.ijid.2020.04.041>.
47. Herold T, Jurinovic V, Arnreich C. Level of IL-6 predicts respiratory failure in hospitalised symptomatic COVID-19 patients. *medRxiv.* 2020. <https://doi.org/10.1101/2020.04.01.20047381>.
48. Makdissi A, Ghanim H, Vora M, Green K, Abuaysheh S, Chaudhuri A, et al. Sitagliptin exerts an anti-inflammatory action. *J Clin Endocrinol Metab.* 2012;97(9):3333-41. <https://doi.org/10.1210/jc.2012-1544>.
49. Liu X, Men P, Wang B, Cai G, Zhao Z. Effect of dipeptidyl-peptidase-4 inhibitors on C reactive protein in patients with type 2 diabetes: a systematic review and meta-analysis. *Lipids Health Dis* 2019;18:14. <https://doi.org/10.1186/s12944-019-1086-4>.
50. Singh AK, Singh R. DPP-4 inhibitors in type 2 diabetes and COVID-19: from a potential repurposed agent to a useful treatment option. *Journal of Diabetology.* 2020;11:131–136. [https://doi.org/10.4103/JOD.JOD\\_53\\_20](https://doi.org/10.4103/JOD.JOD_53_20)
51. Kagal UA, Angadi NB, Matule SM. Effect of dipeptidyl peptidase 4 inhibitors on acute and subacute models of inflammation in male Wistar rats: an experimental study. *Int J Appl Basic Med Res.* 2017;7:26–31. <https://doi.org/10.4103/2229-516X.198516>.
52. Birnbaum Y, Bajaj M, Qian J, Ye Y. Dipeptidyl peptidase-4 inhibition by Saxagliptin prevents inflammation and renal injury by targeting the Nlrp3/ASC inflammasome. *BMJ Open Diabetes Res Care.* 2016;4. <https://doi.org/10.1136/bmjdr-2016-000227>.
53. Makdissi A, Ghanim H, Vora M. Sitagliptin exerts an anti-inflammatory action. *J Clin Endocrinol Metab.* 2012; 97:3333–41. <https://doi.org/10.1210/jc.2012-1544>.

54. Kawasaki T, Chen W, Htwe YM, Tatsumi K, Dudek SM. DPP4 inhibition by sitagliptin attenuates LPS-induced lung injury in mice. *Am J Physiol Lung Cell Mol Physiol*. 2018; 315: L834–L845. <https://doi.org/10.1152/ajplung.00031.2018>.
55. Pal R, Banerjee M, Mukherjee S, Bhogal RS, Kaur A, Bhadada SK. Dipeptidyl peptidase-4 inhibitor use and mortality in COVID-19 patients with diabetes mellitus: an updated systematic review and meta-analysis. *Ther Adv Endocrinol Metab*. 2021; 12:2042018821996482. <https://doi.org/>
56. Yang Y, Cai Z, Zhang J. DPP-4 inhibitors may improve the mortality of coronavirus disease 2019: A meta-analysis. *PLoS One*. 2021;16(5):e0251916. <https://doi.org/10.1371/journal.pone.0251916>.
57. Mirani M, Favacchio G, Carrone F, Betella N, Biamonte E, Morengi E, et al. Impact of Comorbidities and Glycemia at Admission and Dipeptidyl Peptidase 4 Inhibitors in Patients With Type 2 Diabetes With COVID-19: A Case Series From an Academic Hospital in Lombardy, Italy. *Diabetes Care*. 2020;43(12):3042-9. <https://doi.org/10.2337/dc20-1340>.
58. Solerte SB, D'Addio F, Trevisan R, Lovati E, Rossi A, Pastore I, et al. Sitagliptin Treatment at the Time of Hospitalization Was Associated With Reduced Mortality in Patients With Type 2 Diabetes and COVID-19: A Multicenter, Case-Control, Retrospective, Observational Study. *Diabetes Care*. 2020;43(12):2999-3006. <https://doi.org/10.2337/dc20-1521>.
59. Rhee SY, Lee J, Nam H, Kyoung DS, Shin DW, Kim DJ. Effects of a DPP-4 Inhibitor and RAS Blockade on Clinical Outcomes of Patients with Diabetes and COVID-19. *Diabetes Metab J*. 2021. <https://doi.org/10.4093/dmj.2020.0206>
60. Wargny M, Potier L, Gourdy P, Pichelin M, Amadou C, Benhamou PY, et al. Predictors of hospital discharge and mortality in patients with diabetes and COVID-19: updated results from the nationwide CORONADO study. *Diabetologia*. 2021;64(4):778-794. <https://doi.org/10.1007/s00125-020-05351-w>.
61. Montastruc F, Romano C, Montastruc J-L, Silva S, Seguin T, Minville V, et al. Pharmacological characteristics of patients infected with SARS-Cov-2 admitted to Intensive Care Unit in South of France. *Therapies*2020. doi:10.1016/j.therap.2020.05.005.

62. Zhou JH, Wu B, Wang WX. No significant association between dipeptidyl peptidase-4 inhibitors and adverse outcomes of COVID-19. *World Journal of Clinical Cases*. 2020;8(22):5576-88. <https://doi.org/10.12998/wjcc.v8.i22.5576>.
63. Bonora BM, Avogaro A, Fadini GP. Disentangling conflicting evidence on DPP-4 inhibitors and outcomes of COVID-19: narrative review and meta-analysis. *J Endocrinol Invest* 2021; 29:1–8.<https://doi.org/10.1007/s40618-021-01515-6>.
64. Kow CS, Hasan SS. A meta-analysis on the preadmission use of DPP-4 inhibitors and risk of a fatal or severe course of illness in patients with COVID-19. *Therapie*. 2020. <https://doi.org/10.1016/j.therap.2020.12.015>.
65. Pérez-Belmonte LM, Torres-Peña JD, López-Carmona MD, Ayala-Gutiérrez MM, Fuentes-Jiménez F, Huerta LJ, et al. Mortality and other adverse outcomes in patients with type 2 diabetes mellitus admitted for COVID-19 in association with glucose-lowering drugs: a nationwide cohort study. *BMC Med* 2020; 18: 359.<https://doi.org/10.1186/s12916-020-01832-2>.
66. Noh Y, Oh IS, Jeong HE, Fillion KB, Yu OHY, Shin JY. Association Between DPP-4 Inhibitors and COVID-19-Related Outcomes Among Patients With Type 2 Diabetes. *Diabetes Care*. 2021;44(4):e64-e66. <https://doi.org/10.2337/dc20-1824>.
67. Chen Y, Yang D, Cheng B, Chen J, Peng A, Yang C, et al. Clinical characteristics and outcomes of patients with diabetes and COVID-19 in association with glucose-lowering medication. *Diabetes Care* 2020;43:1399–407. <https://doi.org/10.2337/dc20-0660>.
68. Kim MK, Jeon JH, Kim SW, Moon JS, Cho NH, Han E, et al. The Clinical Characteristics and Outcomes of Patients with Moderate-to-Severe Coronavirus Disease 2019 Infection and Diabetes in Daegu, South Korea. *Diabetes Metab J*. 2020;44(4):602-13. <https://doi.org/10.4093/dmj.2020.0146>.
69. Strollo R, Maddaloni E, Dauriz M, Pedone C, Buzzetti R, Pozzilli P. Use of DPP4 inhibitors in Italy does not correlate with diabetes prevalence among COVID-19 deaths. *Diabetes Res Clin Pract*. 2021;171:108444.<https://doi.org/10.1016/j.diabres.2020.108444>.
70. Izzi-Engbeaya C, Distaso W, Amin A, Yang W, Idowu O, Kenkre JS, et al. Adverse outcomes in COVID-19 and diabetes: a retrospective cohort study from three

- London teaching hospitals. *BMJ Open Diabetes Res Care*. 2021;9(1):e001858. <https://doi.org/10.1136/bmjdr-2020-001858>.
71. Yan H, Valdes AM, Vijay A, Wang S, Liang L, Yang S. Role of drugs used for chronic disease management on susceptibility and severity of COVID-19: a large case-control study. *Clin Pharmacol Ther*. 2020;108(6):1185–94. <https://doi.org/10.1002/cpt.2047>
72. Khunti, K, Knighton P, Zaccardi F, Bakhai C, Barron E, Holman N, et al. Prescription of glucose-lowering therapies and risk of COVID-19 mortality in people with type 2 diabetes: a nationwide observational study in England. *Lancet Diabetes Endocrinol*. 2021; 9:293–303. [https://doi.org/10.1016/S2213-8587\(21\)00050-4](https://doi.org/10.1016/S2213-8587(21)00050-4).
73. Dalan R, Ang LW, Tan WYT, Fong SW, Tay WC, Chan YH, et al. The association of hypertension and diabetes pharmacotherapy with COVID-19 severity and immune signatures: an observational study. *Eur Heart J Cardiovasc Pharmacother* 2020;7(3):e48-e51. <https://doi.org/10.1093/ehjcvp/pvaa098>.
74. Stoian AP, Sachinidis A, Stoica RA, Nikolic D, Patti AM, Rizvi AA. The efficacy and safety of dipeptidyl peptidase-4 inhibitors compared to other oral glucose-lowering medications in the treatment of type 2 diabetes. *Metabolism* 2020;109:154295. <https://doi.org/10.1016/j.metabol.2020.154295>.
75. Carramiñana Barrera FC. Seguridad de los inhibidores de la dipeptidil peptidasa 4 [Use of dipeptidyl peptidase-4 inhibitors in patients with diabetes]. *Semergen*. 2018;44:10-7. [https://doi.org/10.1016/S1138-3593\(18\)30370-8](https://doi.org/10.1016/S1138-3593(18)30370-8).
76. Wvan der Zanden R, de Vries F, Lalmohamed A, Driessen JH, de Boer A, Rohde G, et al. Use of Dipeptidyl-Peptidase-4 Inhibitors and the Risk of Pneumonia: A Population-Based Cohort Study. *PLoS One* 2015; 10: e0139367. <https://doi.org/10.1371/journal.pone.0139367>.
77. Hasan SS, Kow CS, Bain A, Kavanagh S, Merchant HA, Hadi MA. Pharmacotherapeutic considerations for the management of diabetes mellitus among hospitalized COVID-19 patients. *Expert Opin Pharmacother*. 2021;22(2):229-40. <https://doi.org/10.1080/14656566.2020.1837114>.
78. Santos A, Magro DO, Evangelista-Poderoso R, Saad MJA. Diabetes, obesity, and insulin resistance in COVID-19: molecular interrelationship and therapeutic

implications. *Diabetol Metab Syndr* 2021;**13**, 23.  
<https://doi.org/10.1186/s13098-021-00639-2>

79. Roussel R, Darmon P, Pichelin M, Goronflot T, Abouleka Y, Ait Bachir L, et al. Use of dipeptidyl peptidase-4 inhibitors and prognosis of COVID-19 in hospitalized patients with type 2 diabetes: A propensity score analysis from the CORONADO study. *Diabetes Obes Metab.* 2021;23(5):1162-72.<https://doi.org/10.1111/dom.14324>.
80. Kosiborod MN, Esterline R, Furtado RHM, Oscarsson J, Gasparyan SB, Koch GG, et al. Dapagliflozin in patients with cardiometabolic risk factors hospitalised with COVID-19 (DARE-19): a randomised, double-blind, placebo-controlled, phase 3 trial. *Lancet Diabetes Endocrinol.* 2021;9(9):586-594. [https://doi.org/10.1016/S2213-8587\(21\)00180-7](https://doi.org/10.1016/S2213-8587(21)00180-7).
81. Hanssen NM, Jandeleit-Dahm KA. Dipeptidyl peptidase-4 inhibitors and cardiovascular and renal disease in type 2 diabetes: What have we learned from the CARMELINA trial? *Diabetes Vasc. Dis. Res.* 2019;16:303–309. <https://doi.org/10.1177/1479164119842339>
82. Valencia I, Peiró C, Lorenzo Ó, Sánchez-Ferrer CF, Eckel J, Romacho T. DPP4 and ACE2 in Diabetes and COVID-19: Therapeutic Targets for Cardiovascular Complications? *Front Pharmacol.* 2020;11:1161.<https://doi.org/10.3389/fphar.2020.01161>.
83. Du H, Wang DW, Chen C. The potential effects of DPP-4 inhibitors on cardiovascular system in COVID-19 patients. *J Cell Mol Med.* 2020;24(18):10274-10278. <https://doi.org/10.1111/jcmm.15674>
84. Smelcerovic A, Kocic G, Gajic M, Tomovic K, Djordjevic V, Stankovic-Djordjevic, et al. DPP-4 Inhibitors in the Prevention/Treatment of Pulmonary Fibrosis, Heart and Kidney Injury Caused by COVID-19-A Therapeutic Approach of Choice in Type 2 Diabetic Patients? *Front Pharmacol.* 2020;11:1185.<https://doi.org/10.3389/fphar.2020.01185>.
